# Supplementary material
Source: HighWire-hosted journal article supplement (https://www.ghspjournal.org/highwire/filestream/3046/field_highwire_adjunct_files/0/19-00012-Nelson-Supplement.pdf)
Supplement: 19-00012-Nelson-Supplement.pdf [file 19-00012-Nelson-Supplement.pdf]

**SUPPLEMENT TABLE 1. Likelihood of Use of Family Planning Services Among Intervention and Comparison Health Facilities in Lofa and Grand Bassa Counties, Liberia May 2016 to July 2017**

| <b>Indicator</b>                                              | <b>Likelihood of Family Planning Use (Incidence Risk Ratio)<sup>a</sup></b> | <b>95% CI (SE)</b>      |
|---------------------------------------------------------------|-----------------------------------------------------------------------------|-------------------------|
| Intervention group                                            | 1.45                                                                        | 0.793, 2.642<br>(0.444) |
| Immediate intervention effect<br>(November 2016-January 2017) | 1.09                                                                        | 0.920, 1.299<br>(0.096) |
| Long-term intervention effect<br>(February-July 2017)         | 0.90                                                                        | 0.738, 1.103<br>(0.093) |

Abbreviations: CI, confidence interval; SE, standard error.

<sup>a</sup>Generalized linear model with a negative binomial distribution and robust variance adjusted for time, facility level (hospital or clinic), and county (Lofa or Grand Bassa).
